# Supplementary material for: Treat and Teach Our Students Well: College Mental Health and Collaborative Campus Communities
Source: Atypon-hosted journal article supplement (doi:10.1176/appi.ps.201500465), 2016-05-16
Supplement: appi.ps.201500465.ds001.pdf [file appi.ps.201500465.ds001.pdf]

## **Appendix 1: Special Populations and Diagnoses in College Students with Higher Risk**

Certain populations such as *LGBT youth, first generation college students and international students* benefit from increased campus community resources and efforts to recruit care providers from diverse backgrounds. Minority status, whether related to sexual orientation, gender identity, ethnicity, or cultural factors, is linked to an increased risk of mental health issues (1-4). Students experiencing stigma and discrimination due to their minority status report higher levels of stress than their non-minority cohorts.

Research has indicated that students of minority status strongly prefer psychiatric assistance from professionals of the same or similar minority status (5,6). Thus, recruitment and retention of appropriately diverse staff must be a consideration.

For some students, such as those who are just identifying or revealing their sexual orientation or gender identity, this may be the first time experiencing stigma and negative views of others. Similarly, international students or adults returning to college may appear outside the norms of the majority of students and be subjected to prejudice, discrimination and stigma. International students can face additional challenges. Geographic separation from their family and culture can, of itself, be a psychological stressor, and can also prohibit home visits during vacations. The burden of their perceived or actual family expectations for their success, and elevated tuition costs that can be a focus of concern, guilt or shame are other stressors for these students.

Psychotherapeutic strategies that mitigate the effects of minority status and improve the MH of these groups of college students are highly recommended. Group therapy specifically targeted to a minority group is a primary strategy to promote social connection and enhance psychological wellbeing. Additionally, campus programs that promote visibility and diversity assist in decreasing stigma and discrimination and engender tolerance and acceptance of others. Diversity training for staff, faculty and mental health professionals is essential.

*Study abroad and other travel:* The college psychiatrist frequently receives requests from students for medications for study abroad programs and other travel, including returning to their country of origin for summer vacations and other holidays. Most campuses provide specific resources and links for students related to official policies for study abroad programs. The Bureau of Consular Affairs, U.S. Department of State also maintains a website with relevant information for students. During their initial evaluation, it is not uncommon for students seeking to study abroad or travel to request a several-month supply of medication; it is important for college mental health programs to develop specific policies related to how such requests are managed.

*Most college-age women are of childbearing age,* and need a brief assessment of reproductive history including: contraceptive method, current plans for conception, and quality/regularity of menses. Under different conditions, oral contraceptive agents may improve, worsen or have no effect on a woman's mood (7,8). Students frequently change their contraceptive choice; therefore, providers can ask about changes in medications at

each visit. Students who become pregnant, are diagnosed with higher risk psychiatric disorders and wish to retain the pregnancy sometimes benefit from a referral to a maternal mental health specialist.

Other higher risk groups who benefit from more intensive treatment include students with *new onset psychosis, moderate-to-severe eating disorders, and drug abuse*. These students often have improved outcomes when referred to a higher level of specialized care, such as an intensive outpatient program. Depending on insurance and other factors, this can occur in the local community, or may require a leave of absence and return to the student's hometown or an area with adequate specialized psychiatric resources.

*Drugs of abuse and dependence:* Another principle of general clinical value, but of particular importance in young adulthood, is that prescriptions for drugs of abuse and dependence should be minimized. Because psychotropic treatment choice can have broader effects on the campus community, campus psychiatrists can benefit from their working relationship with local ER providers by staying abreast of emerging drug use trends. Also, psychiatrists may advocate for policies that restrict or forbid prescriptions of stimulants or benzodiazepines by primary care providers on-campus. Alternatively, health centers may agree to dispense small quantities of medications, i.e., 5-10 pills, followed by a referral to the campus psychiatrist or a chronic pain program. Campus pharmacies and providers can access to CURES reports in order to assess for possible diversion of drugs of abuse.

In cases of anxiety, alcohol abuse and/or mild withdrawal, or chronic pain, on-campus psychiatrists may consider treatment with gabapentin in place of benzodiazepines or opiates (9,10), due to its low abuse potential. The psychiatrist must be aware not only of the use and misuse of prescription medications, but also of the use of illicit substances that might interact with prescription medications or exacerbate psychiatric symptoms. For example, treatment with SSRIs may intensify the reactions to drugs such as marijuana or LSD. Since college students often change patterns of substance use, these patterns should be monitored during each visit. Particularly concerning is the rise in use of, and associated overdose deaths from, opiates, including heroin, in middle class demographics (11). Changing state laws related to medical marijuana have resulted in easier access to Tetrahydrocannabinol (THC) products and have impacted many campuses (12,13).

*ADHD with comorbid depression or anxiety:* For the college psychiatrist, a complaint heard almost daily is that of difficulty concentrating. Since attention, mood, and anxiety symptoms are highly comorbid (14), a detailed developmental and school history at intake facilitates a differential diagnosis of ADHD. Referral for neuropsychological testing when indicated and feasible can also be helpful for diagnostic clarity.

For college students who present for treatment with both mood and attention disturbances, clinicians should consider the use of bupropion as a first line agent capable of targeting both of these symptom groups (15,16); this is not the case for patients with a history of seizures, heavy drinking, or purging behaviors, for whom bupropion is contraindicated. SNRI's such as venlafaxine and duloxetine can also be considered as alternative treatments for ADHD, although evidence supporting this use is preliminary (17, 18). After mood and

anxiety complaints have remitted or resolved, any remaining attention complaints are most appropriately treated with psychostimulants (19, 20). Non-pharmacologic strategies for ADHD include referrals to office of students with disabilities for accommodations, ADHD support groups and links to websites for organizations such as Children and Adults with Attention-deficit Hyperactivity Disorder (CHADD) (21).

*Alcohol use disorders:* Abusive and underage college drinking affects both individual students and the campus milieu, presenting a major public health problem. Consequences of abusive drinking include death, injury, assault, sexual abuse, unsafe sex, academic problems, alcohol abuse disorders, drunk driving, legal difficulties, mood and anxiety problems and increased risk for suicidal behaviors. Successful efforts to address college drinking incorporate targeting individual students, the campus and surrounding community (22). The use of acamprosate, naltrexone and other agents has been studied in adults with longstanding alcohol dependence with modest success (23), though studies in college populations are limited (24). College MH psychiatrists can best address student alcohol misuse through motivational interviewing and psycho-educational strategies (25), targeted treatment for any comorbid mental illness, and referrals to community and campus supports such as Alcoholics Anonymous and Rational Recovery.

*Bipolar spectrum disorders:* The usual onset of these disorders occurs in late childhood or early adolescence (26). The mean age of onset for Bipolar-I disorder is 18, and the mean age of onset for Bipolar-II disorder is 22, making them particularly relevant to the college health practitioner. These disorders are often under-recognized, yet earlier recognition improves outcomes (27). Some presentations in college primary care settings include symptoms of depression, anxiety, mood swings, difficulty sleeping irritability, fatigue, inability to focus and concentrate, alcohol-related problems, sexually transmitted or drug-related infections, relationship problems, financial troubles, erratic occupational histories and legal issues (28). Treatment guidelines for the management of bipolar disorder recommend the use of lithium, lamotrigine, valproate, or neuroleptics such as lurasidone, and omega-3 fatty acids, at times in combination (29-31). Although valproate is effective in the treatment of bipolar disorder, its side effect profile makes this agent less preferable for many college students; this is particularly true in college women, because of its association with polycystic ovarian syndrome and potential teratogenicity. Effective treatment also focuses on medication adherence, improving psychosocial and occupational functioning and optimizing quality of life (32). Psychoeducation for bipolar and related disorders can be especially helpful to students, families and significant others (33, 34).

## ***Appendix 1 References***

1. Cheng HL, Kwan KL, Sevig T: Racial and ethnic minority college students' stigma associated with seeking psychological help: examining psychocultural correlates. *Journal of Counseling Psychology* 60: 98-111, 2013.
2. Baams L, Grossman AH, Russell ST: Minority stress and mechanisms of risk for depression and suicidal ideation among lesbian, gay, and bisexual youth. *Developmental Psychology* 51: 688-696, 2015.

3. Oswalt SB, Wyatt TJ. Sexual orientation and differences in mental health, stress, and academic performance in a national sample of U.S. college students. *Journal of Homosexuality* 58:1255–1280, 2011.
4. Mustanski BS, Garofalo R, Emerson EM: Mental health disorders, psychological distress, and suicidality in a diverse sample of lesbian, gay, bisexual, and transgender youths. *American Journal of Public Health* 100:2426–2432, 2010.
5. Miranda R, Soffer A, Polanco-Roman L, Wheeler A, Moore A: Mental health treatment barriers among racial/ethnic minority versus white young adults 6 months after intake at a college counseling center. *Journal of American College Health* 63:291-8, 2015.
6. Swift JK, Callahan JL, Tompkins KA, Connor DR, Dunn R: A delay-discounting measure of preference for racial/ethnic matching in psychotherapy. *Psychotherapy* 52:315-20, 2015.
7. Cheslack-Postava K, Keyes KM, Lowe SR: Oral contraceptive use and psychiatric disorders in a nationally representative sample of women. *Archives Women's Mental Health* 18: 103-111, 2015.
8. Poromaa IS, Sebebladh B: Adverse mood symptoms with oral contraceptives. *Acta Obstetricia et Gynecologica Scandinavica* 91: 420-427, 2012.
9. Leung JG, Hall-Flavin D, Nelson S et al: The role of gabapentin in the management of alcohol withdrawal and dependence. *Annals of Pharmacotherapy* 49: 897-906, 2015.
10. Mirijello A, D'Angelo C, Ferrulli A et al: Identification and management of alcohol withdrawal syndrome. *Drugs* 75: 353-365, 2015.
11. DeMaria PA, Sterling RC, Risler R et al: Using buprenorphine to treat opioid-dependent university students. *Journal of Addiction Medicine* 4: 236-242.
12. Caldeira KM, Arria AM, O'Grady KE, et al: The occurrence of cannabis use disorders and other cannabis-related problems among first –year college students. *Addictive Behaviors* 33: 397-411, 2008.
13. Volkow ND, Baler RD, Compton WM et al: Adverse health effects of marijuana use. *The New England Journal of Medicine* 370: 2219-2227, 2014.
14. Biederman J: New developments in the treatment of attention-deficit/hyperactivity disorder in primary care. *Primary Care Companion to Journal of clinical Psychiatry* 8: 224-233, 2006.
15. Moriyama TS, Polanczyk GV, Terzi FS et al: Psychopharmacology and psychotherapy for the treatment of adults with ADHD-a systematic review of available meta-analyses. *CNS Spectrums* 18: 296-306, 2013.

16. Wigal SB: Efficacy and safety limitations of attention-deficit hyperactivity disorder pharmacotherapy in children and adults. *CNS Drugs* 23: 21-31, 2009.
17. Bilodeau M, Simon T, Beauchamp MH et al: Duloxetine in adults with ADHD: a randomized, placebo-controlled pilot study. *Journal of Attention Disorders* 18: 169-175, 2014.
18. Amiri S, Farhang S, Ghoreishizadeh MA et al: Double-blind controlled trial of venlafaxine for treatment of adults with attention deficit/hyperactivity disorder. *Human Psychopharmacology* 27: 76-81, 2012.
19. Prevatt F, Young JL: Recognizing and treating attention-deficit/hyperactivity disorder in college students. *Journal of College Student Psychotherapy* 28: 182-200, 2014.
20. Staufer WB, Greydanus DE: Attention-deficit/hyperactivity disorder psychopharmacology for college students. *Pediatric Clinics of North America* 52: 71-84, 2005.
21. <http://www.chadd.org/>
22. National Institute on Alcohol Abuse and Alcoholism, fact sheet on college drinking. April 2015 [www.niaaa.nih.gov](http://www.niaaa.nih.gov).
23. Franck J, Jayaram-Lindstrom N: Pharmacotherapy for alcohol dependence: status and current treatments. *Current Opinions in Neurobiology* 23:692-699, 2013.
24. O-Malley SS, Corbin WR, Leeman RF et al: Reduction of alcohol drinking in young adults by naltrexone: a double-blind, placebo-controlled, randomized clinical trial of efficacy and safety. *Journal of Clinical Psychiatry* 76: 207-213.
25. Read JP, Radomski S, Borsari B: Associations among trauma, posttraumatic stress, and hazardous drinking in college students: considerations for intervention. *Current Addictions Report* 2: 58-67, 2015.
26. Perlis RH, Miyshara S, Marangell LB et al: Long-Term implications of early onset in bipolar disorder: data from the first 1000 participants in the systematic treatment enhancement program for bipolar disorder (STEP-BD). *Biological Psychiatry* 55: 875-881, 2004.
27. Berk M, Bhabic A, Dodd S et al: Does stage of illness impact treatment response in bipolar disorder? Empirical treatment data and their implication for the staging model and early intervention. *Bipolar Disorder* 13: 87-98, 2011.
28. Culpepper, L: The role of primary care clinicians in diagnosing and treating bipolar disorder. *Primary Care Companion Journal of Clinical Psychiatry* 12: 4-9, 2010.

29. Sachs GS, Printz DJ, Kahn DA, Carpenter D, Docherty JP. The Expert Consensus Guideline Series: Medication Treatment of Bipolar Disorder 2000. *Postgrad Med.* 2000 Apr;Spec No.:1-104.
30. Ng F, Hallam K, Lucas N et al: The role of lamotrigine in the management of bipolar disorder. *Neuropsychiatric Disorders Treatment* 3: 463-474, 2007.
31. McNamara RK, Strawn JR. Role of long-chain omega-3 fatty acids in psychiatric practice. *PharmaNutrition* 1: 41-49, 2013.
32. Practice Guideline for the Treatment of Patients with Bipolar Disorder, second edition. April 2002.
33. Federman R: Treatment of bipolar disorder in the university student population. *Journal of College Student Psychotherapy* 25: 24-38, 2011.
34. Lejeune SMW: Special considerations in the treatment of college students with bipolar disorder. *Journal of American College Health* 59: 666-669.
